# Supplementary material for: SHP2 inhibition enhances Yes-associated protein–mediated liver regeneration in murine partial hepatectomy models
Source: JCI Insight. 2022 Aug 8;7(15):e159930. doi: 10.1172/jci.insight.159930 (PMC9462473; doi:10.1172/jci.insight.159930)
Supplement: Supplemental data [file jciinsight-7-159930-s103.pdf]

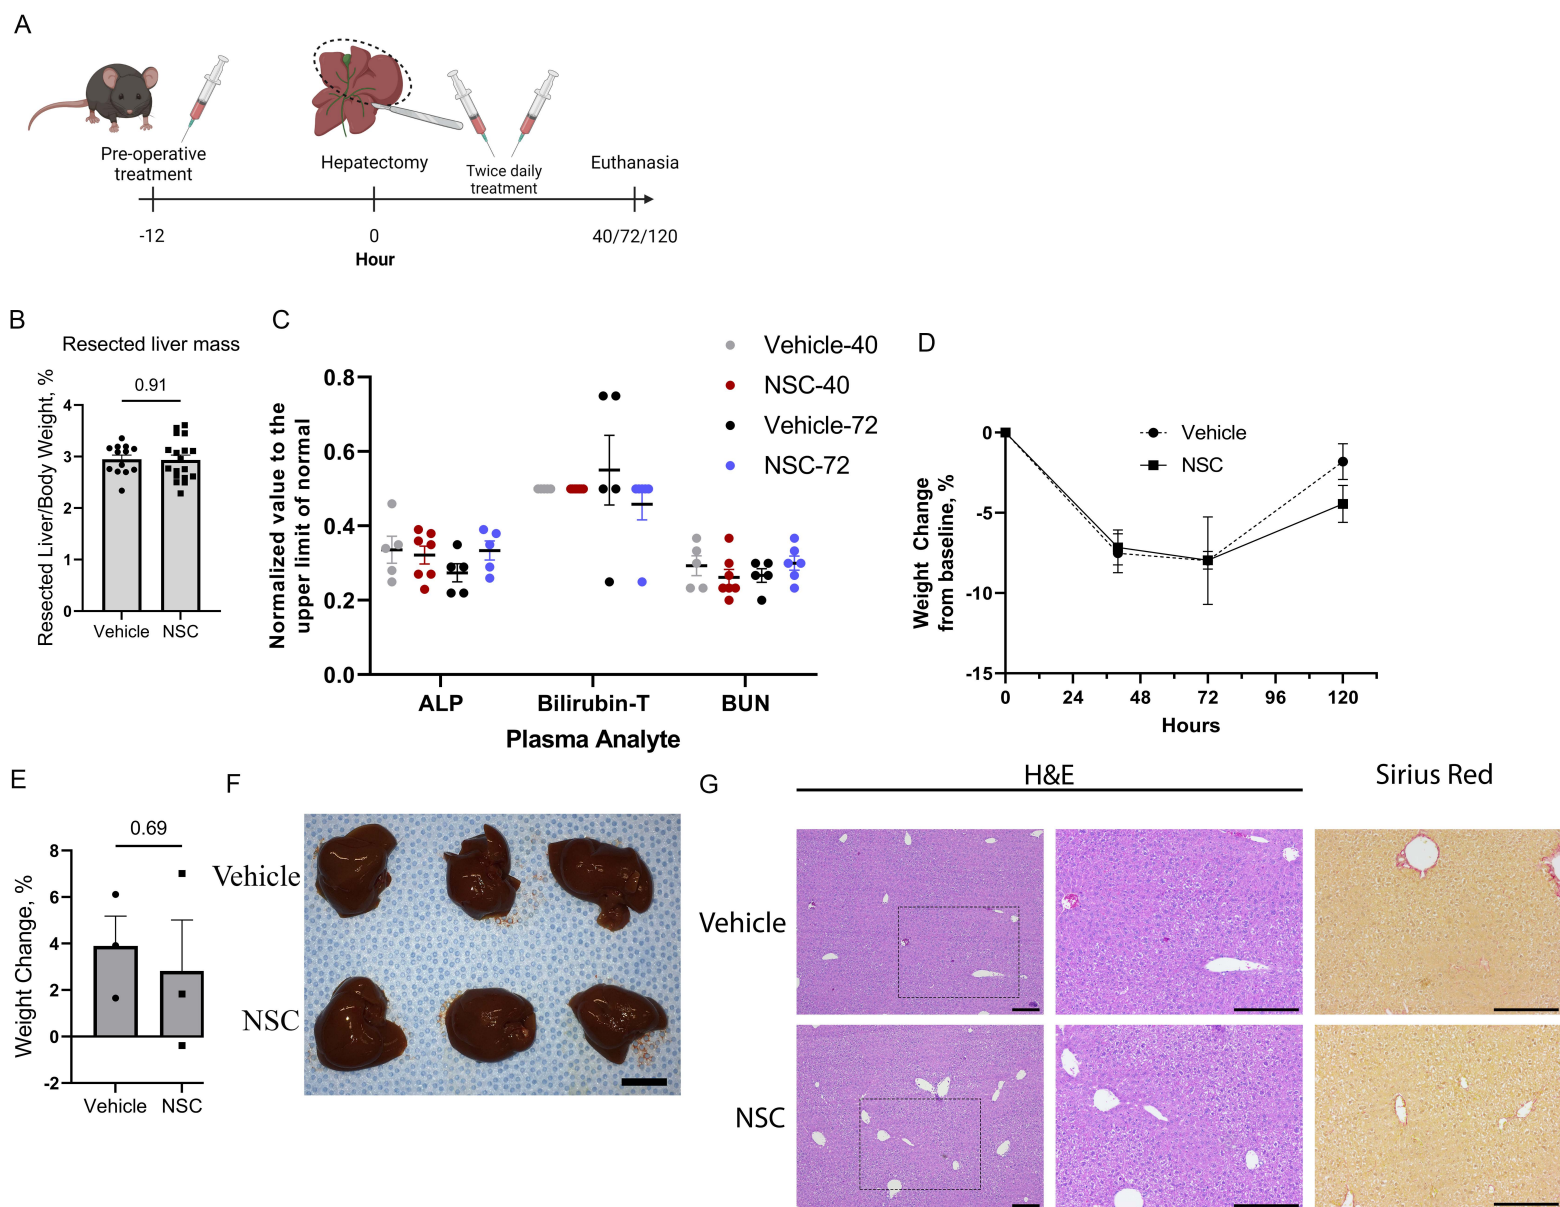

**Supplemental Figure 1. NSC treatment pre- and post- partial hepatectomy is tolerable.**

**A)** Treatment timing for partial hepatectomy models. **B)** Average resected liver mass normalized to body weight in vehicle and NSC treated wild-type mice (n=14-18). **C)** Plasma analysis (n=5-7) of alkaline phosphatase (ALP), total bilirubin (bilirubin-T), and blood urea nitrogen (BUN) in vehicle and NSC treated mice 40- and 72-hours post-hepatectomy. Plasma analytes normalized to upper limit of normal. **D)** Average weight change in mice 40- (n=10-15), 72- (n=6-11), and 120-hours (n=3) post-hepatectomy. **E)** Average weight change from baseline in mice treated with vehicle or NSC for 4 weeks (n=3). **F)** Photograph of mouse livers treated with vehicle or NSC for 4 weeks. Scale bar=1cm. **G)** Representative images of H&E at 40X and 100X magnification and Sirius Red stained liver section in mice treated with vehicle or NSC for 4 weeks (n=3). Scale bars=200µm. Graphs represent mean  $\pm$  SEM. Statistical analysis was performed with student t test.

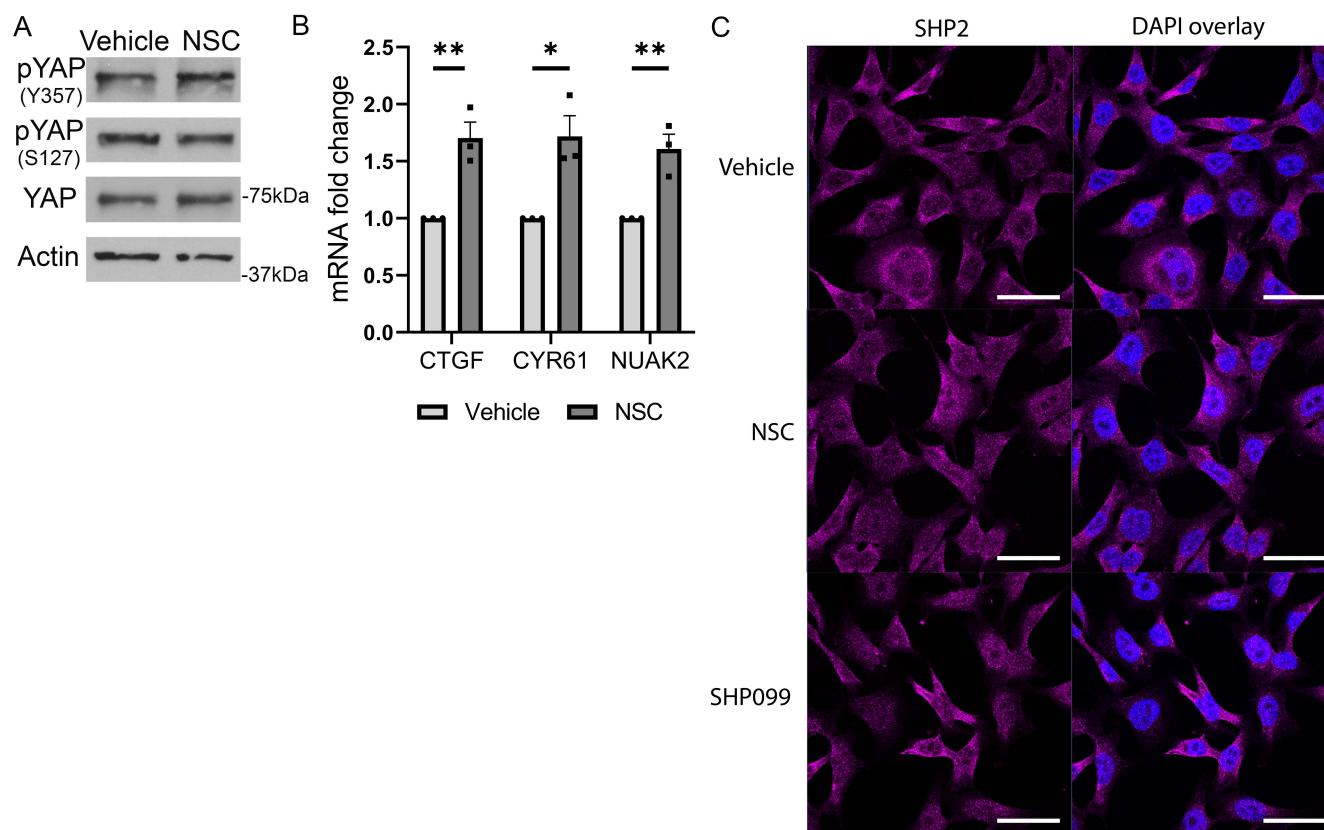

**Supplemental Figure 2. SHP2 inhibition activates YAP in vitro without SHP2 subcellular modification**

**A)** Normal human cholangiocyte (NHC) cell lysates treated with vehicle or NSC (1  $\mu$ M x 24 hours) immunoblot probed for pYAP<sup>Y357</sup>, pYAP<sup>S127</sup>, total YAP, and actin as a loading control. Representative immunoblot from one experiment. **B)** YAP target gene expression in NHC treated with vehicle or NSC (n=3). **C)** Hu1545 SHP2 immunocytochemistry with DAPI counterstain in cells treated with vehicle, NSC (1  $\mu$ M), or SHP099 (1  $\mu$ M). Scale bar = 50  $\mu$ m. Graphs represent mean  $\pm$  SEM (\*p < 0.05, \*\*p < 0.01). Statistical analysis was performed with student t test.

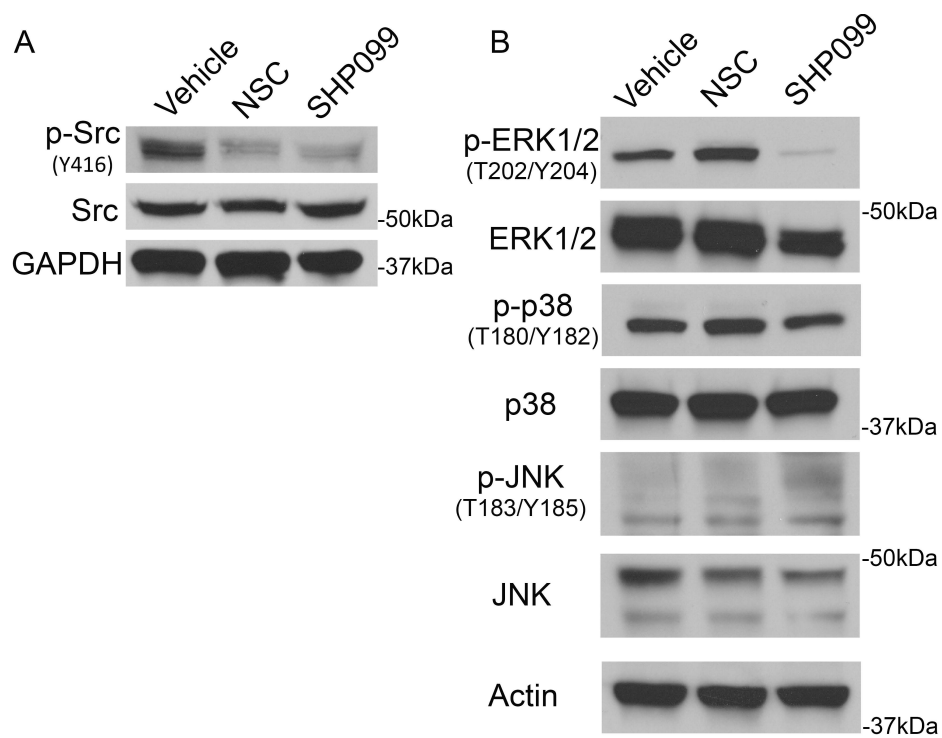

**Supplemental Figure 3. SHP2 inhibition effects on Src and MAPK signaling pathway activation.**

**A)** Hu1545 cell lysate immunoblot for p-Src following vehicle, NSC or SHP099 treatment (1 $\mu$ M x 24 hours) with Src and GAPDH as loading controls. **B)** Hu1545 cell lysate immunoblot for p-ERK1/2, p-p38, and p-JNK following vehicle, NSC or SHP099 treatment (1 $\mu$ M x 24 hours). Immunoblots are representative of 2 independent experiments.

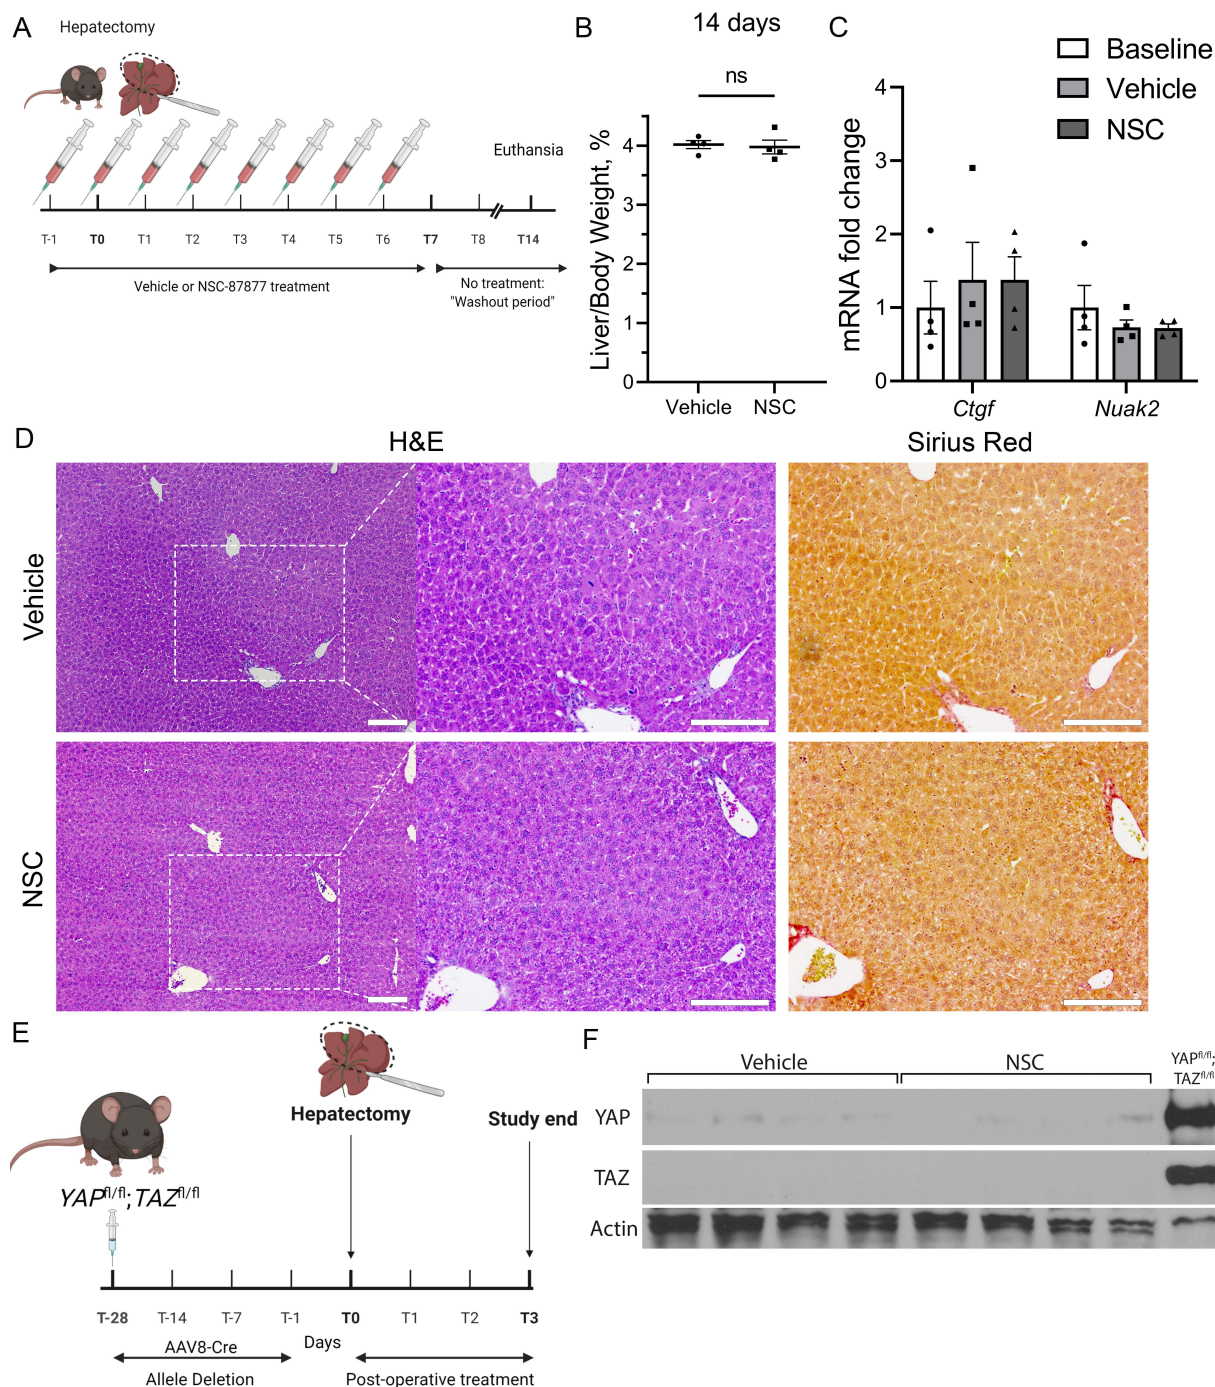

**Supplemental Figure 4. NSC YAP/TAZ activation in vivo is reversible following partial hepatectomy.**

**A)** Experimental schematic for in vivo NSC washout studies. **B)** Liver to body weight ratio 14-days post hepatectomy in mice treated with vehicle or NSC for 7 days post-hepatectomy. **C)** YAP/TAZ target genes (*Ctgf* and *Nuak2*) fold change from baseline in livers 14 days post-hepatectomy. **D)** Representative H&E at low and high power and Sirius red stained liver sections in mice 14 days post-hepatectomy. Scale bars=200μm. **E)** Schematic for the creation of *Yap*<sup>Δhep</sup>/*Taz*<sup>Δhep</sup> by AAV8-Cre intravenous injection. **F)** *Yap*<sup>Δhep</sup>/*Taz*<sup>Δhep</sup> liver lysates probed for YAP and TAZ in mice treated with vehicle or NSC with *Yap*<sup>fl/fl</sup>/*Taz*<sup>fl/fl</sup> as a control with actin as a loading control. Graphs represent mean ± SEM (\*p<0.05, \*\*p<0.01, ns=not significant (p>0.05)). Statistical analysis was performed with student t test (panel B) and one-way ANOVA (panel C).

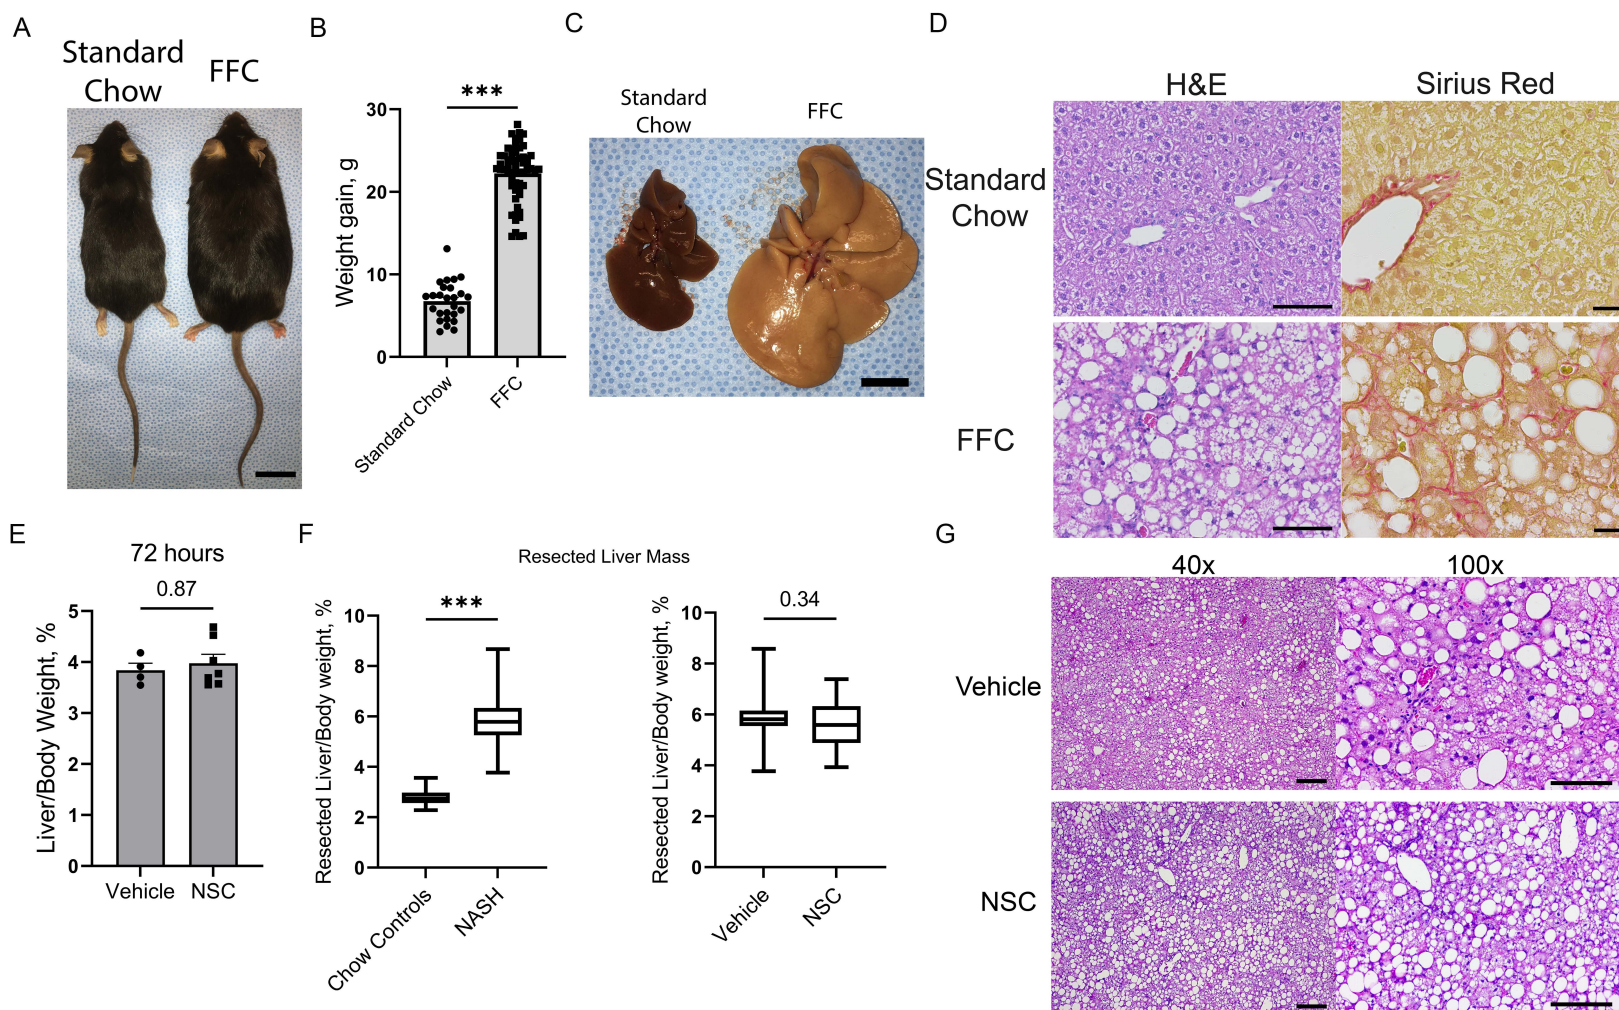

**Supplemental Figure 5. Mice display typical characteristics of NASH following FFC diet**

**A)** Representative photograph of C57BL/6 mice fed standard chow or high fat, fructose, and cholesterol diet (FFC) for 24 weeks. Scale bar=2cm. **B)** Average mouse weight gain after 24 weeks on standard chow or FFC diet. **C)** Representative photograph of mouse livers after 24 weeks on standard chow or FFC diet. Scale bar=1cm. **D)** Representative H&E and Sirius red stained liver sections from mice fed standard chow or FFC diet (n=3). Scale bars=50µm **E)** Mean liver to body weight ratio 72-hours post-hepatectomy in NASH mice treated with vehicle (n=4) or NSC (n=8). **F)** Resected liver mass normalized to mouse body weight (median and interquartile range with whiskers at the minimum and maximum value) in all chow control and NASH mice and NASH mice treated with vehicle (n=18) or NSC (n=12). **G)** Representative images at 2 magnifications (40x and 100x) of H&E stain livers from vehicle or NSC treated NASH mice 72-hours post-hepatectomy (n=3). Scale bars=200µm. Graphs represent mean ± SEM (\*\*\*p<0.001). Statistical analysis was performed with student t test. Non-alcoholic steatohepatitis (NASH).

**Supplemental Table 2. Antibody list**

| <b>Antibody</b>                                                  | <b>Manufacturer</b> | <b>Cat. #</b> | <b>Application</b> | <b>Dilution</b> |
|------------------------------------------------------------------|---------------------|---------------|--------------------|-----------------|
| p-YAP (Y357)                                                     | Abcam               | ab62751       | WB                 | 1:1000          |
| p-YAP (S127)                                                     | Cell Signaling      | 4911          | WB                 | 1:1000          |
| YAP                                                              | Cell Signaling      | 4912          | WB                 | 1:1000          |
| YAP                                                              | Santa Cruz          | sc-101199     | IF                 | 1:500           |
| TAZ                                                              | Cell Signaling      | 4883          | WB                 | 1:1000          |
| PCNA                                                             | Cell Signaling      | 13110         | WB                 | 1:1000          |
| JNK                                                              | Cell Signaling      | 9252          | WB                 | 1:1000          |
| p-JNK (T183/Y185)                                                | Cell Signaling      | 4671          | WB                 | 1:1000          |
| ERK1/2                                                           | Cell Signaling      | 9102          | WB                 | 1:1000          |
| p-ERK1/2 (T202/Y204)                                             | Cell Signaling      | 4370          | WB                 | 1:1000          |
| p38                                                              | Cell Signaling      | 8690          | WB                 | 1:1000          |
| p-p38 (T180/Y182)                                                | Cell Signaling      | 4511          | WB                 | 1:1000          |
| Src                                                              | Cell Signaling      | 2110          | WB                 | 1:1000          |
| p-SRC (Y416)                                                     | Cell Signaling      | 2101          | WB                 | 1:1000          |
| p-NR4A1 (S351)                                                   | Thermo Sci          | PA5-105155    | WB                 | 1:1000          |
| NR4A1                                                            | Santa Cruz          | sc-166166     | WB                 | 1:1000          |
| NR4A1                                                            | Santa Cruz          | sc-166166     | IF                 | 1:500           |
| Ki67                                                             | Novus Bio           | NB110-89717H  | IHC                | 1:50            |
| BrdU                                                             | Rockland            | 600-401-c29   | IF                 | 1:200           |
| SHP2                                                             | Cell Signaling      | 3752          | IF                 | 1:500           |
| Actin                                                            | Santa Cruz          | sc-47778      | WB                 | 1:1000          |
| GAPDH                                                            | Santa Cruz          | sc-47724      | WB                 | 1:1000          |
| WB=Western blot; IF=Immunofluorescence; IHC=Immunohistochemistry |                     |               |                    |                 |

**Supplemental Table 3. qRT-PCR primer sequences**

| <b>Primer</b>       | <b>Forward (5'-3')</b> | <b>Reverse (5'-3')</b> |
|---------------------|------------------------|------------------------|
| <b>Human</b>        |                        |                        |
| <i>CTGF</i>         | CAGTGTCTGACTTCGACAACGC | CCATCGGCGTGTTTGGAGTA   |
| <i>CYR61</i>        | GAGTGGGTCTGTGACGAGGAT  | GGTTGTATAGGATGCGAGGCT  |
| <i>NUAK2</i>        | GATGCACATACGGAGGGAGATT | ATCACGATCTTGCTGCTGTTCT |
| <b>Mouse</b>        |                        |                        |
| <i>Ctgf</i>         | CACTCTGCCAGTGGAGTTCA   | AAGATGTCATTGTCCCAGG    |
| <i>Nuak2</i>        | CAGGCATTTCTTCCGACAGATC | GAGAGGCCAAAGTCAGCAAT   |
| <i>Nr4a1</i>        | TCATCACTGATCGACACG     | CTTCAGACAGCTAGCAATG    |
| <b>Housekeeping</b> |                        |                        |
| <i>18s</i>          | CGCTTCCTTACCTGGTTGAT   | GAGCGACCAAAGGAACCATA   |
